# Supplementary material for: DNA polygonal cavities with tunable shapes and sizes
Source: Royal Society of Chemistry journal article supplement (doi:10.1039/c5cc06092c), 2015-01-01
Supplement: c5cc06092c1.pdf [file c5cc06092c1.pdf]

Supporting Information for

## **DNA polygonal cavities with tunable shapes and sizes**

Sha Sun, Mingyang Wang, Feifei Zhang and Jin Zhu\*

*Department of Polymer Science and Engineering, School of Chemistry and Chemical Engineering, State Key Laboratory of Coordination Chemistry, Nanjing National Laboratory of Microstructures, Collaborative Innovation Center of Chemistry for Life Sciences, Nanjing University, Nanjing 210093, China*

\*Corresponding author. Phone: +86-25-83686291; Fax: +86-25-83317761; Email: jinz@nju.edu.cn

## Table of Contents

|                                                                   |                |
|-------------------------------------------------------------------|----------------|
| <b>1. Materials .....</b>                                         | <b>S3</b>      |
| <b>2. Design of Self-Assembled DNA Nanostructures.....</b>        | <b>S3-S7</b>   |
| <b>3. Experimental Procedures. ....</b>                           | <b>S7-S8</b>   |
| <b>4. Self-Assembly of Monomers.....</b>                          | <b>S8</b>      |
| <b>5. Self-Assembly of Size-Tunable Triangular Cavities.....</b>  | <b>S9-S10</b>  |
| <b>6. Self-Assembly of Size-Tunable Square Cavities .....</b>     | <b>S11-S12</b> |
| <b>7. Self-Assembly of Size-Tunable Pentagonal Cavities .....</b> | <b>S13-S15</b> |
| <b>8. Self-Assembly of Size-Tunable Hexagonal Cavities.....</b>   | <b>S16-S18</b> |
| <b>9. TEM Yield Analysis .....</b>                                | <b>S19-S20</b> |
| <b>10. DNA Sequence Information .....</b>                         | <b>S21-S29</b> |
| <b>11. References .....</b>                                       | <b>S30</b>     |

## 1. Materials

All DNA stands were purchased from Sangon Biotech (Shanghai) Co. Ltd and DL2000 DNA molecular weight marker was from TaKaRa Biotechnology (Dalian) Co. Ltd. Gel electrophoresis was performed on a Bio-Rad system using 2% agarose gel. Transmission electron microscopy (TEM) imaging was performed using a JEOL JEM-1011 facility.

## 2. Design of Self-Assembled DNA Nanostructures

DNA sequences for the nanostructures is generated by program Sequin.<sup>S1</sup> To reduce undesired interaction patterns, criton size is set to 7, which means any continuous sequence of 7 or more nucleotides (nt) appears at most once.

DNA nanostructures are designed by following Peng Yin's LEGO-like model (for all the DNA sequence information, please see Section 9 of the Supporting Information).<sup>S2,S3</sup> The design of monomers, in which DNA double helices are arranged as square lattice bundles (Fig. S1), are performed in five steps. First, program Sequin is used to generate sequences for 18 DNA double helices (red strands in Fig. S2A), and the second step is to add a sequence of T8 (eight continuous thymidines, blank strands in Fig. S2B) to both ends of one strand of each helix (5'-3' strand for odd helices H(odd), 3'-5' strand for even helices H(even), refer to Fig. S1 for the odd and even numbering of helices). In the first two steps, there is no connection among these helices, and then the helices will be linked and arranged into a square lattice as Fig. S1 shows in the following two steps. The third step is performed by cutting both long strands of each helix into short strands with the length of 16 nt (Fig. S2C), and then in the fourth step, short strands of H(odd) are linked with the corresponding strands of neighboring H(even) on the left end in a clockwise direction. Take H7 (helix 7) as an example (Fig. S1 and Fig. S2D), its first short strand is linked to that of H16, and then the second strand of H7 should be linked to the second one of H8, the third strand of H7 to the third one of H4, and the fourth strand of H7 to the fourth one of H6, and so on. After the linkage, we have constructed the designed structure, which consists of 32 nt strands and 16 nt strands. It then performs the fifth step, the remaining 16 nt strands are merged to 32 nt ones to improve the stability of the nanostructures.

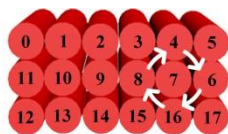

**Fig. S1** The cross-section of the monomers viewed from the head.

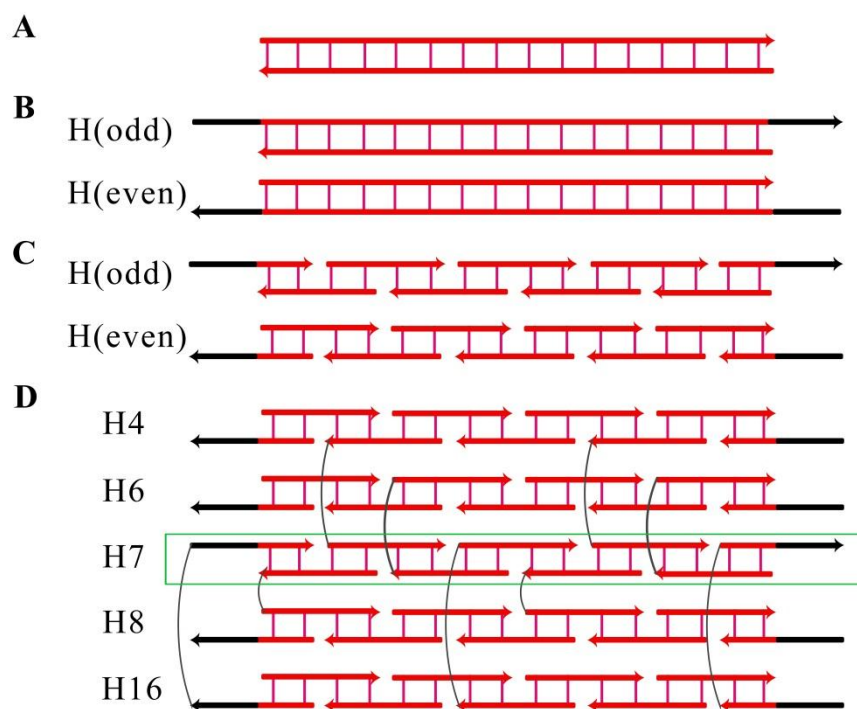

**Fig. S2** Design strategy of DNA nanostructures. Arrows indicate the 3' ends of strands.

To construct polygonal cavities, Sticky End 1 and Sticky End 2 are added to the monomers (Fig. S3 to S6). Three green-blue circles refer to Sticky End 1, which is comprised of three green strands and three blue strands. Accordingly, three yellow-purple circles refer to Sticky End 2, which is comprised of three yellow strands and three purple strands.

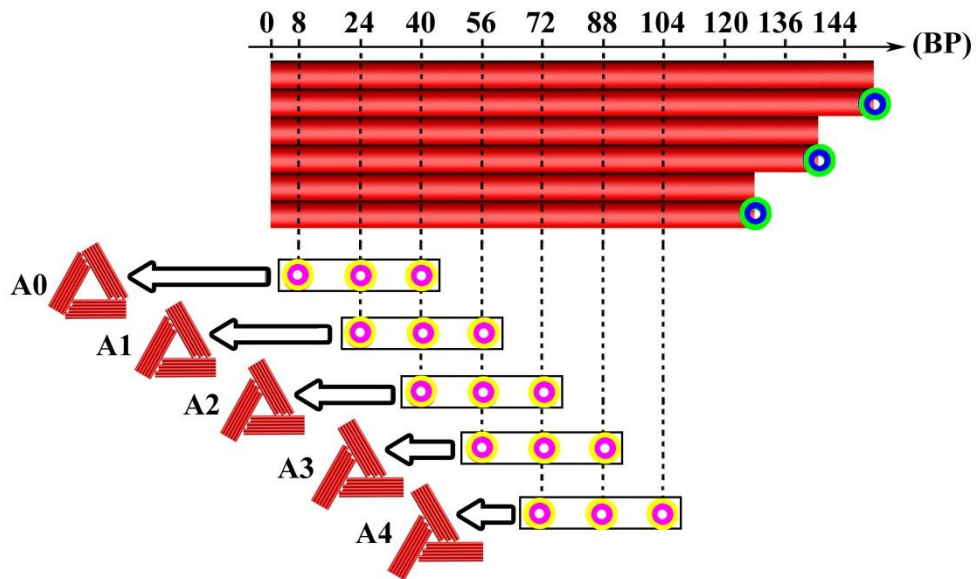

**Fig. S3** Illustration of locations of Sticky End 1 and Sticky End 2 added on Monomer A for the construction of triangular cavities.

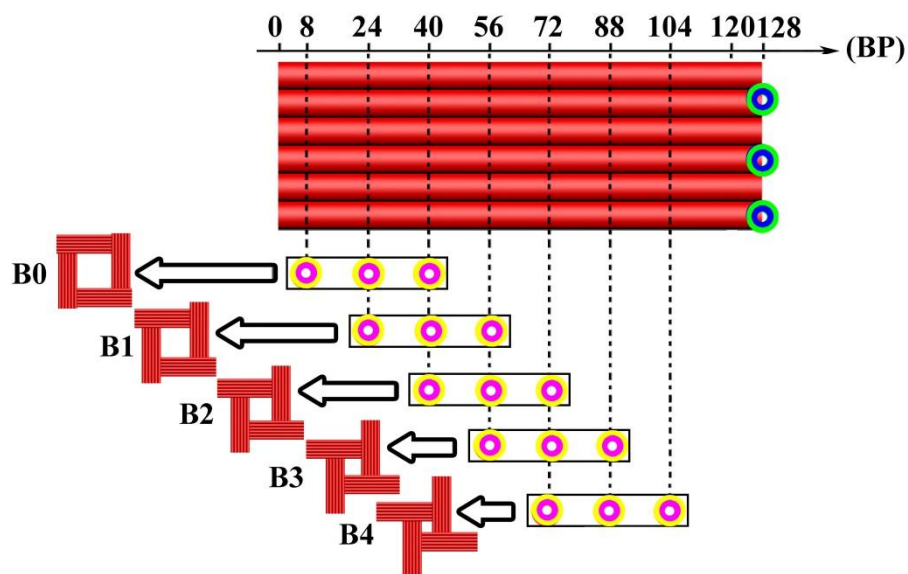

**Fig. S4** Illustration of locations of Sticky End 1 and Sticky End 2 added on Monomer B for the construction of square cavities.

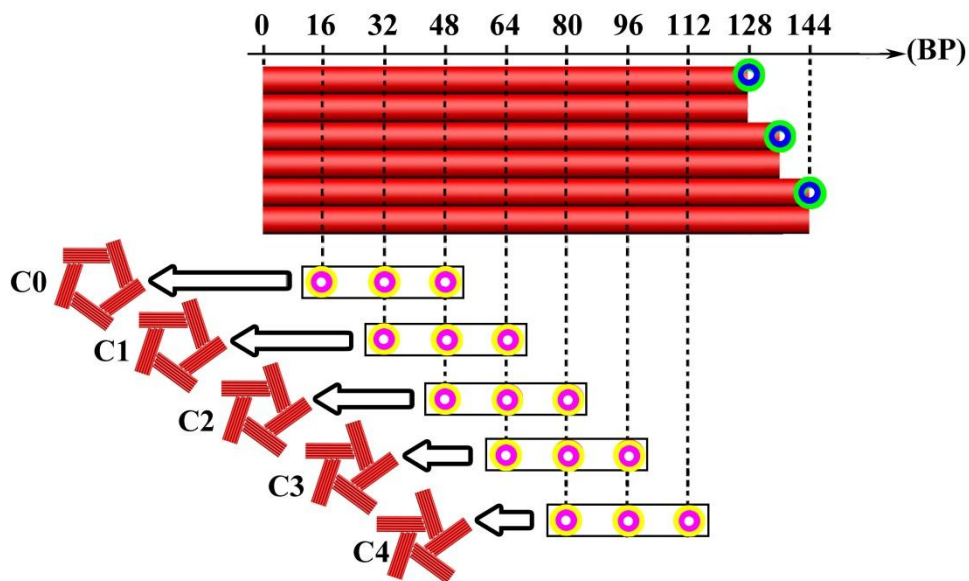

**Fig. S5** Illustration of locations of Sticky End 1 and Sticky End 2 added on Monomer C for the construction of pentagonal cavities.

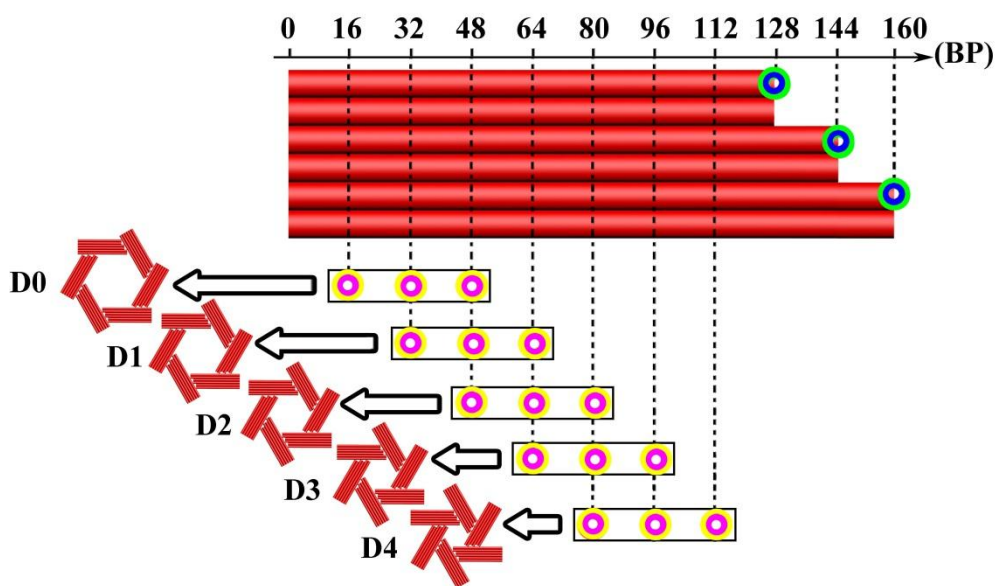

**Fig. S6** Illustration of locations of Sticky End 1 and Sticky End 2 added on Monomer D for the construction of hexagonal cavities.

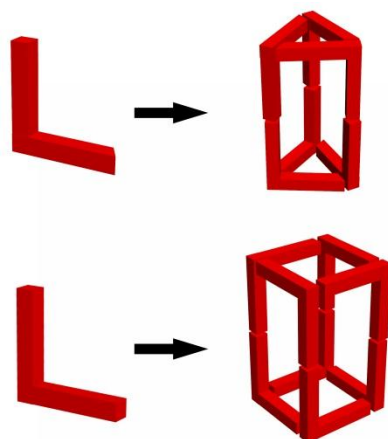

**Fig. S7** The strategy for constructing two-dimensional (2D) polygons can in principle be extended to three-dimensional (3D) wire-frame structures by the hierarchical assembly of L-shaped monomers, in which one arm resembling the monomer of the polygonal cavity described above serves as the polygonal base edge and the other arm with a cuboid shape serves as half of the lateral edge. The upper diagram shows the construction of the triangular prism and the lower diagram for the cube.

### 3. Experimental Procedures

**Preparation of nanostructures:** Hundreds of single-strand DNA (ssDNA) were mixed and then freeze-dried. After the dissolution of ssDNA in 0.5×TE buffer (5 mM Tris, 1 mM EDTA, pH=8.0, supplemented with 40 mM MgCl<sub>2</sub>) to a final concentration of 200 nM per strand, the solution was annealed from 90 °C to 60 °C at a cooling rate of 5 min/°C and from 60 °C to 24 °C at a rate of 40 min/°C.

**Agarose gel electrophoresis:** The annealed samples were loaded to a native 2% agarose gel with 0.5 µg/mL ethidium bromide (running buffer: 0.5×TBE buffer, containing 44.5 mM Tris, 44.5 mM boric acid, and 1 mM EDTA, supplemented with 11 mM MgCl<sub>2</sub>) and gel electrophoresis was performed at 80 volts for 1.5 h in an ice bath.

**Yield analysis:** We estimated the assembly yield by comparing the fluorescence intensity of the product band to that of a standard sample with known mass value<sup>S2</sup> (the double stranded 750 bp DNA in DL2000 DNA mixture). The yield was then obtained as the ratio between the calculated mass of the product band and the total mass of the assembling DNA strands that was loaded into the gel.

**TEM imaging:** 2.4 µL of the unpurified sample was mixed with 0.3 µL of ssDNA (with a sequence of 5'-GCCTGAAGTCTGGTGCTTAGGCCTTGAAATCA -3' for the generation of a hydrophilic TEM grid surface) and the whole solution was loaded onto a glass slide. On top of the solution was covered with a carbon-coated TEM grid

and the contact between the solution and grid was allowed to proceed for 2 min. The TEM grid was then stained with a 2% uranyl formate aqueous solution (containing 25 mM NaOH) for 2 min followed by twice washing with water. TEM imaging was performed at 100 kV.

#### 4. Self-Assembly of Monomers

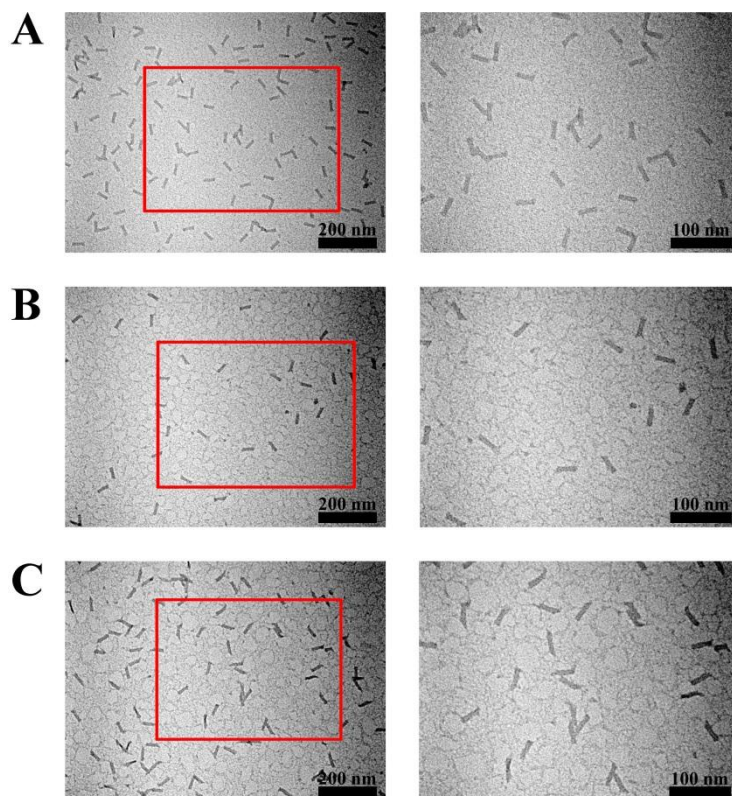

**Fig. S8** TEM images of monomers. (A) Monomer B. (B) Monomer C. (C) Monomer D. The right column is the enlarged view of the left column.



## 5. Self-Assembly of Size-Tunable Triangular Cavities

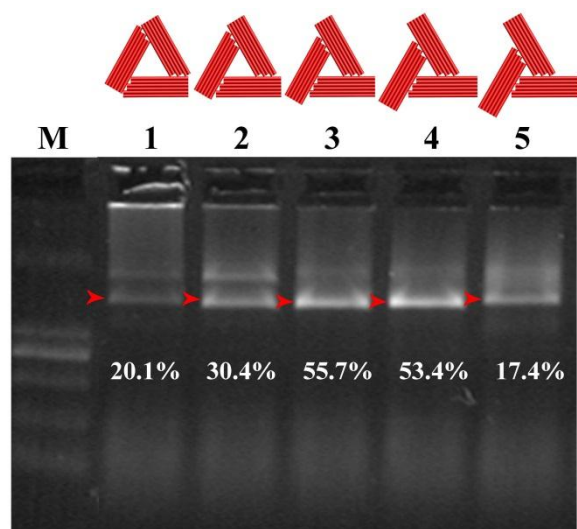

**Fig. S9** Agarose gel electrophoresis of triangular cavities. Lane 1: A0; lane 2: A1; lane 3: A2; lane 4: A3; lane 5: A4. Estimated gel yield is shown below each product band marked with a red arrowhead.

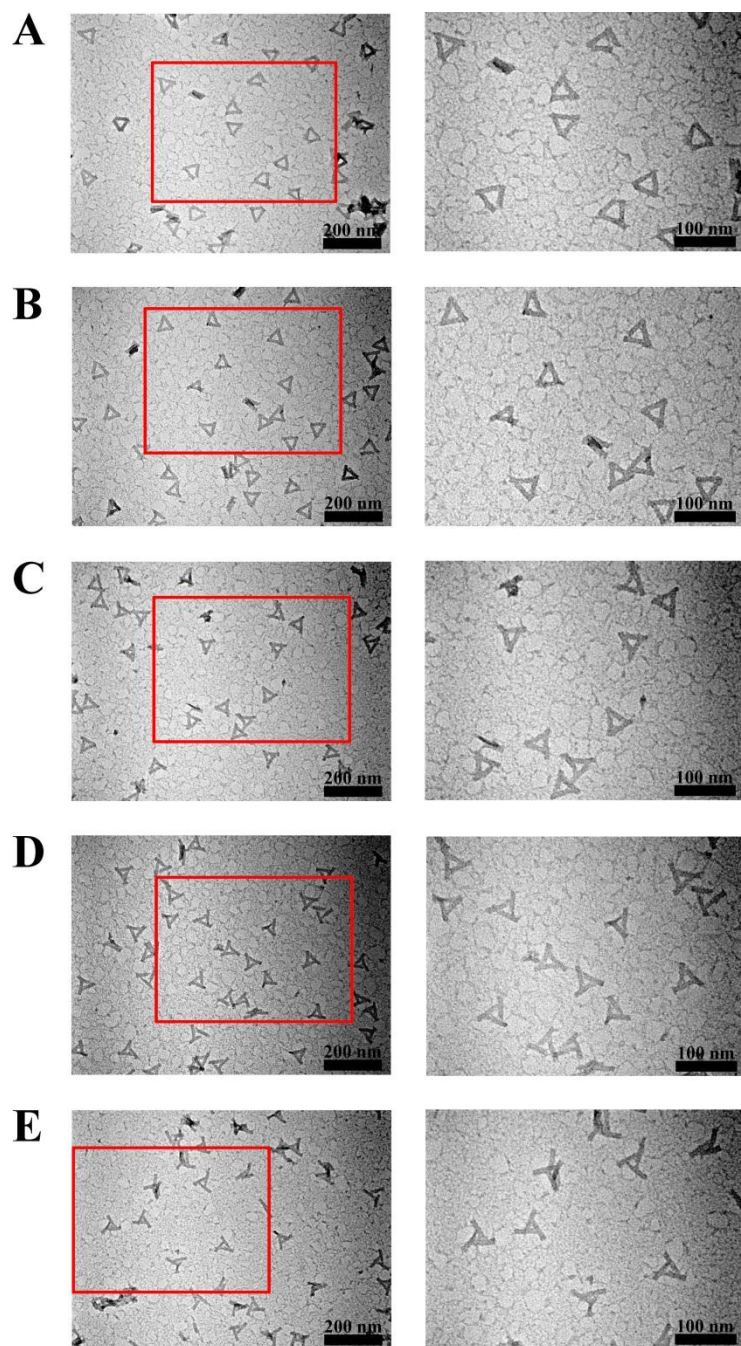

**Fig. S10** TEM images of triangular cavities. (A) A0. (B) A1. (C) A2. (D) A3. (E) A4. The right column is the enlarged view of the left column. Internal side lengths were measured as  $24.2 \pm 1.3$  nm,  $20.5 \pm 1.2$  nm,  $15.2 \pm 1.4$  nm,  $12.8 \pm 1.0$  nm,  $7.6 \pm 1.0$  nm for A0, A1, A2, A3 and A4, respectively. 30 objects were measured for each structure.

## 6. Self-Assembly of Size-Tunable Square Cavities

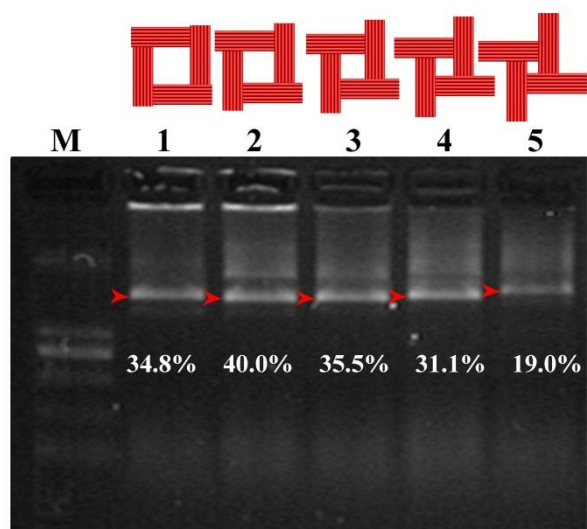

**Fig. S11** Agarose gel electrophoresis of square cavities. Lane 1: B0; lane 2: B1; lane 3: B2; lane 4: B3; lane 5: B4. Estimated gel yield is shown below each product band marked with a red arrowhead.

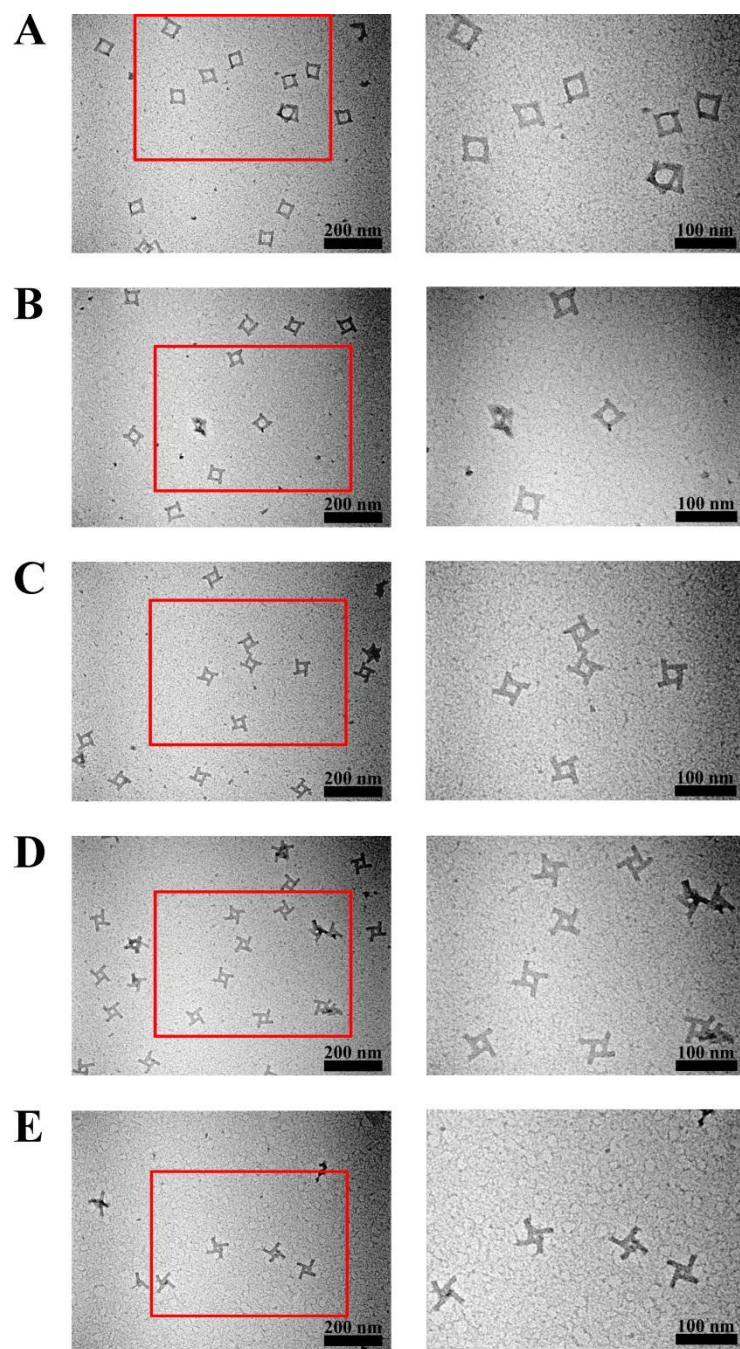

**Fig. S12** TEM images of square cavities. (A) B0. (B) B1. (C) B2. (D) B3. (E) B4. The right column is the enlarged view of the left column. Internal side lengths were measured as  $24.0 \pm 1.3$  nm,  $19.2 \pm 1.0$  nm,  $14.9 \pm 1.1$  nm,  $9.8 \pm 1.0$  nm,  $5.1 \pm 1.3$  nm for B0, B1, B2, B3 and B4, respectively. 30 objects were measured for each structure.

## 7. Self-Assembly of Size-Tunable Pentagonal Cavities

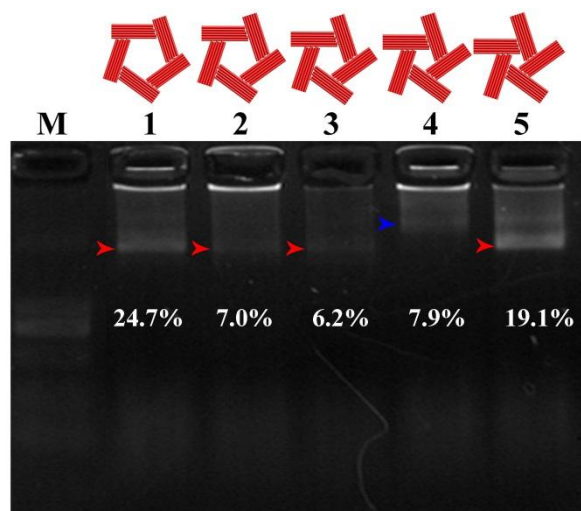

**Fig. S13** Agarose gel electrophoresis of pentagonal cavities. Lane 1: C0; lane 2: C1; lane 3: C2; lane 4: C3; lane 5: C4. Estimated gel yield is shown below each product band marked with a red arrowhead. The band marked with a blue arrowhead (lane 4) corresponds to the stacked structure of two C3.

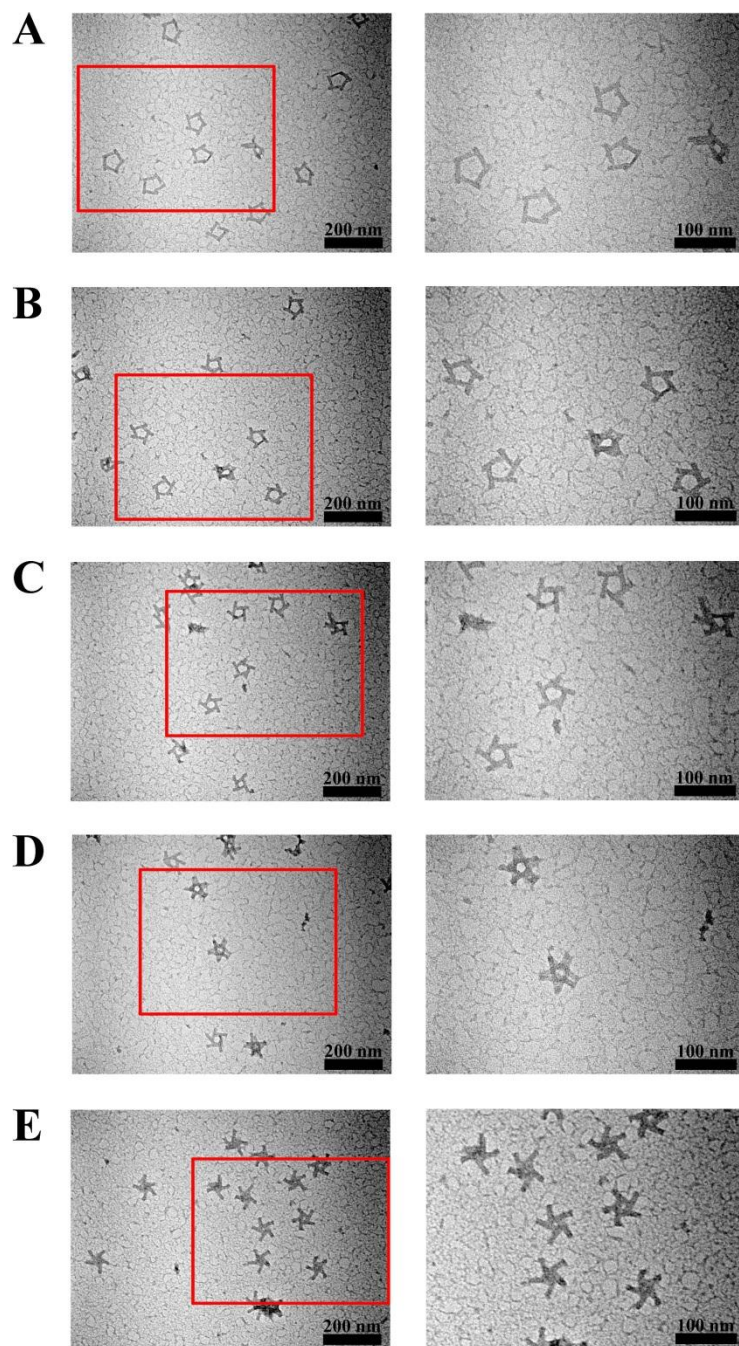

**Fig. S14** TEM images of pentagonal cavities. (A) C0. (B) C1. (C) C2. (D) C3. (E) C4. The right column is the enlarged view of the left column. Internal side lengths were measured as  $24.8 \pm 1.4$  nm,  $19.3 \pm 1.0$  nm,  $16.3 \pm 1.2$  nm,  $10.6 \pm 0.7$  nm,  $4.8 \pm 1.0$  nm for C0, C1, C2, C3 and C4, respectively. 30 objects were measured for each structure.

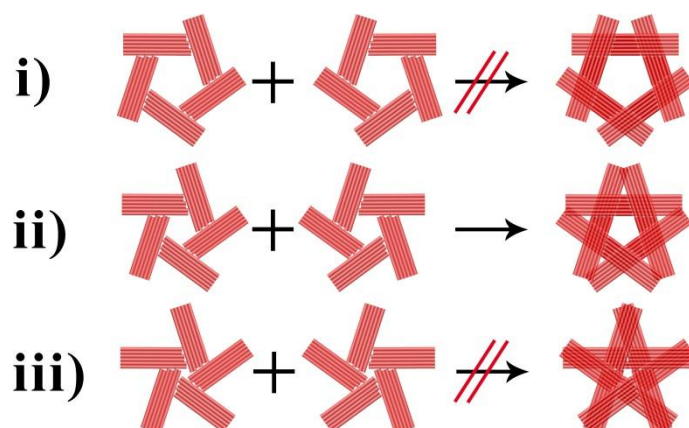

**Fig. S15** Schematic illustration of the stacked pentagonal cavity structure. The stacked structure forms when the extended branch length allows the termini contact between two individual structures with mirror symmetry. We speculate that the contact of all the ends provides a more stable state, but the current data are not sufficient to reveal the nature of the interaction between non-coaxial helices. In diagram i, the extended branch of the pentagonal cavity is too short to completely contact with each other when two structures stack together (e.g., C1 and C2). In diagram ii, the length of the extended branch allows the contact between each other (e.g., C3), which results in the stacked structure. In diagram iii, the extended branch of the pentagonal cavity is too long (e.g., C4), and no stacked structure forms.

## 8. Self-Assembly of Size-Tunable Hexagonal Cavities

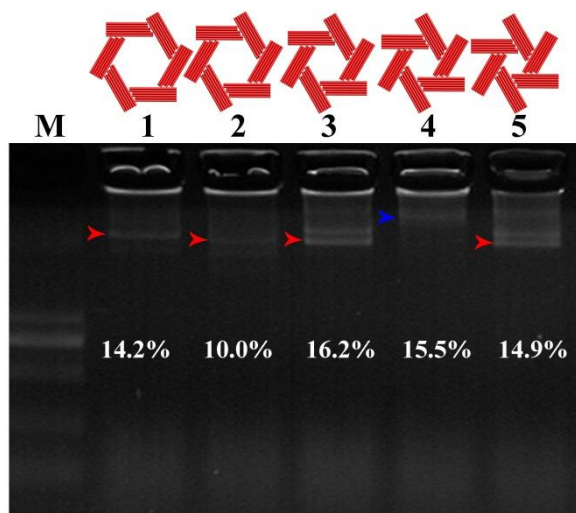

**Fig. S16** Agarose gel electrophoresis of hexagonal cavities. Lane 1: D0; lane 2: D1; lane 3: D2; lane 4: D3; lane 5: D4. Estimated gel yield is shown below each product band marked with a red arrowhead. The band marked with a blue arrowhead (lane 4) is the stacked structure of two D3.



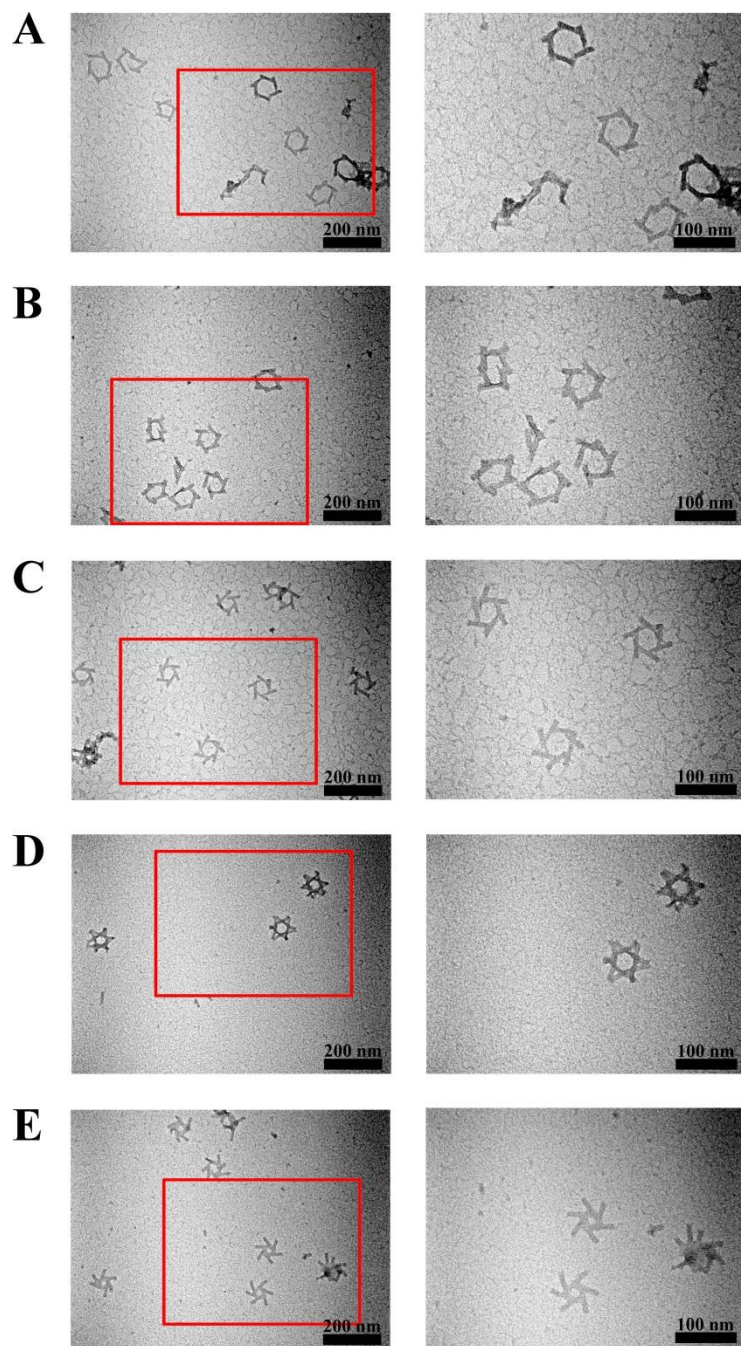

**Fig. S17** TEM images of hexagonal cavities. (A) D0. (B) D1. (C) D2. (D) D3. (E) D4. The right column is the enlarged view of the left column. Internal side lengths were measured as  $26.3 \pm 1.5$  nm,  $23.3 \pm 1.5$  nm,  $20.0 \pm 1.3$  nm,  $16.1 \pm 1.0$  nm,  $8.2 \pm 1.3$  nm for D0, D1, D2, D3 and D4, respectively. 30 objects were measured for each structure.

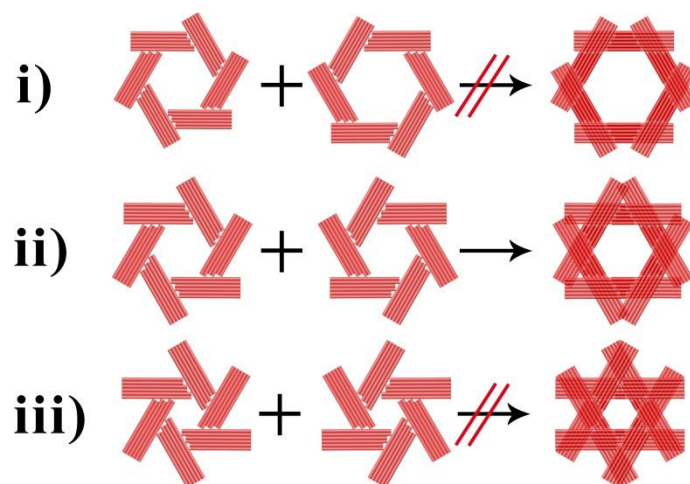

**Fig. S18** Schematic illustration of the stacked hexagonal cavity structure. In diagram i, the extended branch of the hexagonal cavity is too short to completely contact with each other when two structures stack together (e.g., D1 and D2). In diagram ii, the length of the extended branch allows the contact between each other (e.g., D3), which results in the stacked structure. In diagram iii, the extended branch of the hexagonal cavity is too long (e.g., D4) and no stacked structure forms.

## 9. TEM Yield Analysis

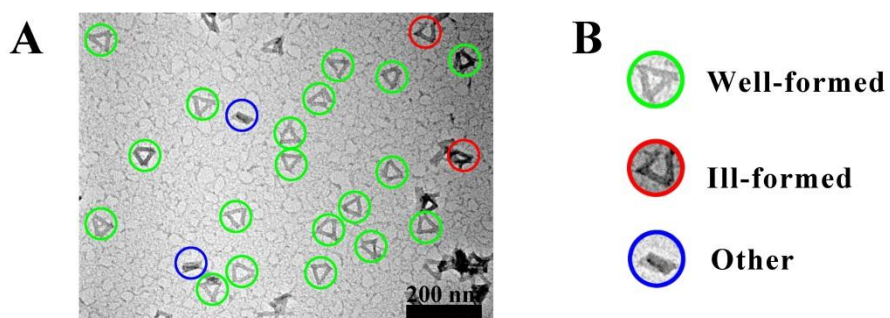

**Fig. S19** (A) A representative TEM image of A0. Particles in green circles showed “well-formed” structures without obvious defects. Particles in red circles that showed designed shapes but were distorted or not completely closed were categorized as “ill-formed” structures. Particles in blue circles showed “other” structures with shapes other than the designed one. (B) Examples of “well-formed”, “ill-formed” and “other” structure of A0.

**Table 1.** TEM yield analysis of polygonal cavities. TEM yield was determined as a ratio of the well-formed particles over total counted particles.

| <b>Name</b> | <b>Well-formed</b> | <b>Ill-formed</b> | <b>Other</b> | <b>TEM yield of well-formed structures</b> |
|-------------|--------------------|-------------------|--------------|--------------------------------------------|
| A0          | 113                | 14                | 10           | 82.5%                                      |
| A1          | 98                 | 10                | 6            | 86.0%                                      |
| A2          | 103                | 16                | 7            | 81.7%                                      |
| A3          | 96                 | 8                 | 12           | 82.8%                                      |
| A4          | 82                 | 12                | 17           | 73.9%                                      |
| B0          | 97                 | 7                 | 10           | 85.1%                                      |
| B1          | 96                 | 6                 | 13           | 83.5%                                      |
| B2          | 90                 | 6                 | 11           | 84.1%                                      |
| B3          | 88                 | 8                 | 8            | 84.6%                                      |
| B4          | 92                 | 15                | 7            | 80.7%                                      |
| C0          | 102                | 6                 | 14           | 83.6%                                      |
| C1          | 93                 | 10                | 19           | 76.2%                                      |
| C2          | 89                 | 15                | 22           | 70.6%                                      |
| C3          | 90                 | 8                 | 15           | 79.6%                                      |
| C4          | 92                 | 10                | 8            | 83.6%                                      |
| D0          | 108                | 10                | 24           | 76.1%                                      |
| D1          | 96                 | 12                | 21           | 74.4%                                      |
| D2          | 90                 | 18                | 27           | 66.7%                                      |
| D3          | 97                 | 14                | 21           | 73.5%                                      |
| D4          | 88                 | 10                | 28           | 69.8%                                      |

## 10. DNA Sequence Information

**Table 2.** DNA sequences of sticky ends

| Name                         | Sequence (5'-3') | Length |
|------------------------------|------------------|--------|
| Sticky End 1 (green strand)  | GCTGAAGAAG       | 10     |
| Sticky End 1 (blue strand)   | ATATGGAGAT       | 10     |
| Sticky End 2 (yellow strand) | CTTCTTCAGC       | 10     |
| Sticky End 2 (purple strand) | ATCTCCATAT       | 10     |

**Table 3.** DNA sequences of monomers (the sequences used for each nanostructure is marked in the corresponding color: **Monomer B**, **Monomer C**, **Monomer D**. Monomer A shares the same sequences with Monomer D.)

| Name | Sequence(5'to3')                                  | Length |
|------|---------------------------------------------------|--------|
| 1    | ACGCGGCCTTTTTTTTTTTTTTTGTGCTTGCCTGCGTGGCATTACGAT  | 48     |
| 2    | CCGCTCCTTTTTTTTTTTTTTTGGTTCGGAGCTGAGCCGAGACGTG    | 48     |
| 3    | CCGCTTCCTTTTTTTTTTTTTTTGGTGAGGAGGGATATGGAACTAG    | 48     |
| 4    | GGTTCCAGTCCCTAACCAAAACCCTTTTTTTTTTTTTTTGGAGCAAG   | 48     |
| 5    | TTCACAACCTAAGACCTCGATCTCTTTTTTTTTTTTTTTGGGACAAA   | 48     |
| 6    | TGATTCCGCCACAAACATTTGCGCTTTTTTTTTTTTTTTGAGGACAT   | 48     |
| 7    | GCCACGACGCAAGCACGTATTATGGCGAAGATGACGGTACTATACAGG  | 48     |
| 8    | TTAAATATCTAGTTCCATATCCCTCCTCACGGTGTCAACGACCCGG    | 48     |
| 9    | TAACTATTACAATACCGCGCAAATGTTTGTGGCGGAATCAACAAGTCA  | 48     |
| 10   | GCGCTCAAATTACCGATTGCGACAGCATAGTCGGGTTTTGGTTAGGGA  | 48     |
| 11   | TGCCGCCACCTACCAATTAGATCCGGTTCGGGAATTAACCGGGGT     | 48     |
| 12   | TACGCCTATTCCAAATCTCATTCTTATCATAGACGGATGAGTATATT   | 48     |
| 13   | CAGCCTTCTCTGTATAGTACCGTCATCTTCGCAGGATAATGGATGTTG  | 48     |
| 14   | CCACAGATTCTAACTCAATAGTTAATGTCAGAAACGGGCTTGGGACCA  | 48     |
| 15   | ATCCACGCTCTCGCACTGGCCGGGACGAAGGCGCACGGGGAACACGAT  | 48     |
| 16   | TACTACCTCCATCCTCTGTCGCAATCGGTAATTTAGCGCGTCTGGCG   | 48     |
| 17   | AACCCTTACCCCGGTAGGTAGTAGTTGAAAGAAGAATAAGGTATGGG   | 48     |
| 18   | TTACAGCTACTGCATTGTCGGCACCAACATCCATCTGTGGGCAGATG   | 48     |
| 19   | CGCATCTACATCTGCCACGGGATCGGGCACAGCGCAGGAGAGTAGAA   | 48     |
| 20   | CGTCCGTACCCGTCCAATGTGACAAGGTTTGAAGCTAAGCCAGGTCAG  | 48     |
| 21   | TTATTCTTCTTCAACATATTTAAGTTTTACAGGTAGAGGAAGAGAGG   | 48     |
| 22   | CAACCGCCGTGCAATCCGATGAACTCGTACTCAAAGGGTTGGAGATAG  | 48     |
| 23   | CCCATGTTCTTGCCCTGGACTCTAGCTCGAACCACGAAATAGAAAGCA  | 48     |
| 24   | ATCCGCAACTGCCATCATTAGCCGTGACTTGTGTGCCGACAATGCAGT  | 48     |
| 25   | TCCCTGCGCTGTGCCAAAAGGCTGGATAGAGAATGGTTGAGTGAACGA  | 48     |
| 26   | TACTTCCACCTCTCTCCTCTACCCTGAAAACGGGCGGCAGCAATGTA   | 48     |
| 27   | TCGTGCCTTGGTCCCACGGCTAATGATGGCAGTTGCGGATACAAGAGC  | 48     |
| 28   | ATGACAGTCGGAAATCGTTACTAACGCCAGACGTTTCATCGGATTCGAC | 48     |
| 29   | TGTGCTCCGACATCGCATATAACGTACATTGCGGGTGATAGTGATTAA  | 48     |

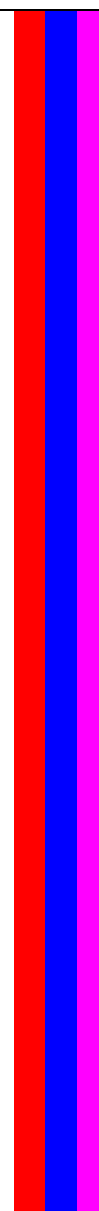

|    |                                                   |    |
|----|---------------------------------------------------|----|
| 30 | AGCATTCCCGTTGCCTCGCTACAACACCACACGGTGCTGGTGACGAGG  | 48 |
| 31 | AGGCCCCCTCGTTCACTCAACCATTCTCTATCAGCTGTA AATTGAATG | 48 |
| 32 | CGATCATGCTCGCGCCAGGCACGAGAACGTGGGTCTGAACGGAATACG  | 48 |
| 33 | CTCCTGCCTACGTCAGGCAATAGCAAACGAATACATATTGGGGTGTGC  | 48 |
| 34 | CGATTACTCCCATACCTTAGTAACGATTTCGACTGTCATGGATGCAT   | 48 |
| 35 | CATAATACTTTTTTTT                                  | 16 |
| 36 | GCCCTTCCTTTTTTTT                                  | 16 |
| 37 | TTGACACCTTTTTTTT                                  | 16 |
| 38 | GGAAGCGGGAGGATGG                                  | 16 |
| 39 | ATTATCCTATGTCCTC                                  | 16 |
| 40 | TTTTTTTTGGTATTGT                                  | 16 |
| 41 | TTTTTTTTGGGTCCGG                                  | 16 |
| 42 | TTTTTTTTGACTATGC                                  | 16 |
| 43 | GGCTCAGCTCCGAACCGGAAGGGCTATGATAA                  | 32 |
| 44 | TTAATTCCCTTGCTCCGGAGGCGGGTGCGAGA                  | 32 |
| 45 | CATCCGTCTTTGTCCCGCCGCGTGAGTTAGA                   | 32 |
| 46 | CCCGGCCACCGGACCCGAGATCGAGGTCTTAG                  | 32 |
| 47 | GATCCCGTATCGTAATGAAATGAGATTTGGAA                  | 32 |
| 48 | TGTCACATCACGTCTCATCTAATTGGTAGGGT                  | 32 |
| 49 | ATTTCTGTAATATACTGCGTGGATTGGACGGG                  | 32 |
| 50 | AGCCCGTTTCTGACATGTTGTGAAGTTCGAGC                  | 32 |
| 51 | CCCCGTGCGCCTTCGTCTGGAACCGAGTACGA                  | 32 |
| 52 | GCTTAGCTTCAAACCTTAGGCGTAGTGTGGTG                  | 32 |
| 53 | TATCACCCCTATCTCCTACGGACGCTGACGTA                  | 32 |
| 54 | CCAGCACCTGCTTTCTTAGATGCGGGCGCGAG                  | 32 |
| 55 | GCTATTGCATCGTGTTAGAGTCCAGGGCAAG                   | 32 |
| 56 | AACTCCACTTCTACTCTGTAGCGAGGCAACG                   | 32 |
| 57 | GTCTTGGCCTGACCTGCGTTATATGCGATGTC                  | 32 |
| 58 | CATTTATCTTAATCACAGTAATCGCTGCGAAA                  | 32 |
| 59 | GCACTCGCCCTCGTCAGGCAGGACCAACGGT                   | 32 |
| 60 | TGTGTCCACATTCAATCATGATCGCGGAGACA                  | 32 |
| 61 | GTTTCCAGACCCACGTTCAACATGGGCTCGGGTT                | 32 |
| 62 | CAATATGTATTTCGTTTGGCGGTTGCACGCCGG                 | 32 |
| 63 | TAAGCCTCTGTCTCCGGTGGAGTTGGAACCTAGGGCTGCGGGTCATAG  | 48 |
| 64 | CAAGCGCCACCGTTGGGCCAAGACGGTTTGTAGGCTGCAAGTAGCAAG  | 48 |
| 65 | CGATATCCTTTTCGAGTGGAAGTAGGAAAACGGTAGACGTTAGGCGAA  | 48 |
| 66 | AAGACCCTTATGACTCTTGGTTCCCCGCGTGGATAAATGGGGATACT   | 48 |
| 67 | ATCTATTATCAAACCTCGGGTCCCAACCCGAGGCGAGTGCGGTAGTCG  | 48 |
| 68 | TGCACACCAGGCTCCAGGCGTCCAGCTCTTGTGGACACAGGAGCTTG   | 48 |
| 69 | CGCAGCCCTAAGTTCGGGGGGCTGGGGCCCGAGGTTTTAGAGGTCCG   | 48 |
| 70 | TTGACTTTTCGCCTAACGTCTACCGTTTTCCGGAGCACAGGGCTCCG   | 48 |
| 71 | CCGAATCCGTATTCTGGACGCCTGGAGCCTGGTGTGCAGCAGGCCG    | 48 |
| 72 | AAACTATATTGCTCATCGCGTCATGCATCCGGAACCAAGAGTCATA    | 48 |
| 73 | CACTTACTTTTTTACATTTAGCCCGGAGCCCGGGCAGCTGGCGGCGA   | 48 |

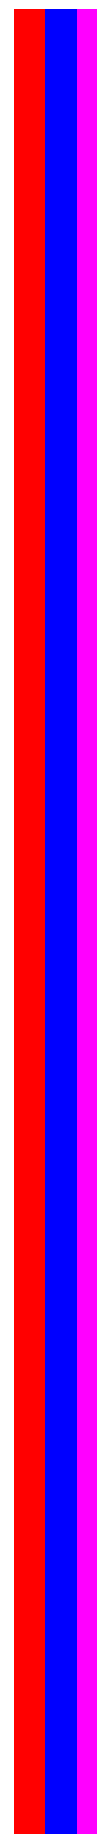

|     |                                                    |    |
|-----|----------------------------------------------------|----|
| 74  | CTGCGACCTACGACCTGCGGCCACAATTTCCGCGGACCATCAGCTAA    | 48 |
| 75  | CCATTCCACGGACCTCTAAAACCTCGGGCCCCGTGATCGGTGTAATGG   | 48 |
| 76  | GCTCATTATAACTTCTGAATTCGGGATTCAGAGCTCAGGGACCTGATG   | 48 |
| 77  | TCTGTGATCCGAAATCTGTGACGTTTGACAGAAGTCATGTGGCTTGTG   | 48 |
| 78  | TTAGAACTCCGATACCGACGCGATGAGCAATATAGTGTTTTGAGATAC   | 48 |
| 79  | ACTCCCGTTTCGCCGCCAGTTCTAAGGACTTAAGGTTTCAGGTGACCGAA | 48 |
| 80  | ATTCTACGCACCGAGCTCCATGGCCATTACATAATGAGCGACGTGCG    | 48 |
| 81  | TCGCTTATCGCACGTCTGATTTCAGGAACTCAGAGATTAGTGTAAGAC   | 48 |
| 82  | GCATTCTGCCAGCCGCATGCTGAGTGCCGTATGACGAATGACGTGTGG   | 48 |
| 83  | CCTGAACCTTAAGTCCAAGTCGAAAAAATGAAAGTCAAGAGACACAA    | 48 |
| 84  | CAATAACCATCGTTCGACAACCGACAGGCCTCACGGGAGTCCGGCGAT   | 48 |
| 85  | TATACTTTAAATCAGCCGACCGGCTGCCAATTCGGCATGAAGCATGGG   | 48 |
| 86  | TCAAACACCGTACACTGCGCACCCAGGCCTGCGCCATGGAGCTCGGTG   | 48 |
| 87  | ACTAATCTCTGAGTTCTGGAATGGGATCTGGGAACTAGGGATCCGGTA   | 48 |
| 88  | CAAACGCCTTGTGTCTCTTGACTTTCATTTTTGTAAAGTGTATAAAGC   | 48 |
| 89  | TTACTATTATCAGGTTGGTGCAGTGTACGGTGTTCGAGGATCTAG      | 48 |
| 90  | AGCCGTCAGGTTCCCGTGGCCCGGTATCTCATCGGTTGTCGAACGAT    | 48 |
| 91  | TTTTTTTTCAATACACACCGCGCTTTTATATTGCAAGCTACGGGCG     | 48 |
| 92  | CCACTATTTTCGGTCAGCGGGCCACGGGAACCTGACGGCTTTTTTTTT   | 48 |
| 93  | GGATATCGGGTATCGG                                   | 16 |
| 94  | CCGATCACCAAGCTCC                                   | 16 |
| 95  | TTGCAGCCTACAAACCGGAATGCTGGAAATTG                   | 32 |
| 96  | AGCTGCCCAGTATCCCGGGCGTTGGATTTCGG                   | 32 |
| 97  | TGGTCCGCCGACTACCGAGGCTTAAGAAGTTA                   | 32 |
| 98  | ACGTCACACGACACCCGGGACCCGAAGTTTGA                   | 32 |
| 99  | CTGAATACCTATGACCTGGGCCGAGGTCGTA                    | 32 |
| 100 | CTCAGCATCTTGCTACGCTAAATGTAAAAAA                    | 32 |
| 101 | TCATGCCGTTAGCTGAATCACAGAGCGGCTGG                   | 32 |
| 102 | CCCTGAGCTCTGAATCTAATAGATAATTGGCA                   | 32 |
| 103 | ACATGACTTCTGTCAAAGGTCTTGAGGCCTG                    | 32 |
| 104 | CATTTCGTCATACGGCAGGTCGCAGGCTGTAGG                  | 32 |
| 105 | GCTTGCAAATCGCCGGCAGAATGCCGAGTTAC                   | 32 |
| 106 | ACTCGTGACCCATGCTATAAGCGATATGCAGA                   | 32 |
| 107 | GCCCAGACCACAAGCCCGGTCGGCTGATTT                     | 32 |
| 108 | TAACCACAGTCTTTACACGCATGGCGTCGGGT                   | 32 |
| 109 | TTCGCGTGCCACACGTGCGCGGTGTGTATTGA                   | 32 |
| 110 | CTCCGATCGCCGTAATAGTGGTACGAAGT                      | 32 |
| 111 | CCAGACATCCGACATTAAGTATAATAAATTA                    | 32 |
| 112 | GCCTTAATAGCCTGTAGGTTATTGGTTTGCGG                   | 32 |
| 113 | TTTTTTTTACTTCGTAGGCGTTTGTTTTTTTT                   | 32 |
| 114 | TTTTTTTTCCGCAAACATCGGAAGTTTTTTTT                   | 32 |
| 115 | TTTTTTTTACCCGACGCCATGCGTCTACAGCTACGAGTGGTCAGCA     | 48 |
| 116 | TTTTTTTTTACCGGATCCCTAGTTCAGATCCGATAGAAATATTGTGAT   | 48 |
| 117 | CTTAGCAATCTGCATAAATAGTAAAATGTCGGATGTCTGGTTTTTTTT   | 48 |

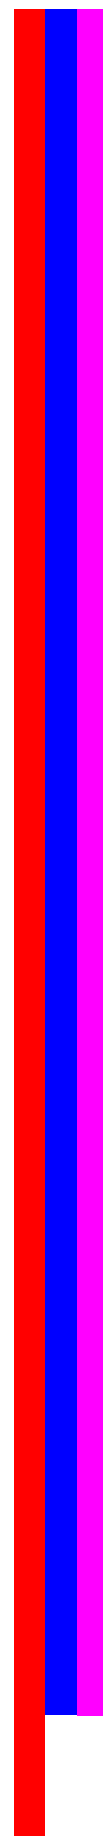

|     |                                                   |    |
|-----|---------------------------------------------------|----|
| 118 | TGCTAACAGTAACTCGGTCTGGGCTACAGGCTATTAAGGCTTTTTTTT  | 48 |
| 119 | TAGCAACTTGCTGACCTGTTAGCAGGACAATA                  | 32 |
| 120 | CTTTACGCATCACAATTTGCTAAGAGCTATGG                  | 32 |
| 121 | TTTTTTTTCCATAGCTTGTGGTTATTTTTTTT                  | 32 |
| 122 | TTTTTTTTTATTGTCCACGCGAATTTTTTTT                   | 32 |
| 123 | TTTTTTTTTAATTTATAGTTGCTATTTTTTTT                  | 32 |
| 124 | TTTTTTTTCTAGATCCGCGTAAAGTTTTTTTT                  | 32 |
| 125 | TAGCAACTTGCTGACCTGTTAGCAGGACAATAAGATATCAGGCGCCAA  | 48 |
| 126 | AATACTTCCCATAGCTTGTGGTTAGAAGATCCAAAATGCTATGTGATT  | 48 |
| 127 | TGATATCTTATTGTCCACGCGAAGCTTAGGCCTGAAAATTTTTTTT    | 48 |
| 128 | TTTTTTTTACCAGACTTCAGGCTTTAATTTATAGTTGCTAGAGACTAT  | 48 |
| 129 | GTCTATGAGCTGTGAGTCACTCGACTAGATCCGCGTAAAGGGTTACA   | 48 |
| 130 | AGCATTGTGGATCTTCTGTACGATTAGCGACTGACTGTTGGACTACG   | 48 |
| 131 | ATGTACCGAATCACAT                                  | 16 |
| 132 | CTGAACGCCGTACGTCTCGAGTGACTCACAGCTCATAGACTTGAATTA  | 48 |
| 133 | TTGTGCACTATGAACA                                  | 16 |
| 134 | TTTTTTTTCGTAGTCCAACAGTCAGTCGCTAAAGTATCGCGAATAATA  | 48 |
| 135 | AATCTAACAAATTTTTGCGTTCAGTGTTCATAGTGACAATTTTTTTT   | 48 |
| 136 | ATTTCAAGGCCTAAGCGAGTAACATGTGAATC                  | 32 |
| 137 | AATGGCCAATAGTCTCGAAGTATTAATAATTT                  | 32 |
| 138 | CGCGTACTTAGTATCTAAGCCTGAAGTCTGGT                  | 32 |
| 139 | TTTTTTTTGATTACATGGCCATTTTTTTTTT                   | 32 |
| 140 | TTTTTTTTTTGGCGCCAGTACGCGTTTTTTTTT                 | 32 |
| 141 | GCCGATTATATTATTCGTTAGATTICTAAATT                  | 32 |
| 142 | TTTTTTTTAATTTAGACGGTACATTTTTTTTTT                 | 32 |
| 143 | TTTTTTTTAATTCATAAATCGGCTTTTTTTTT                  | 32 |
| 144 | TGTTACTCACCCGACGCCATGCGTCCTACAGTCCAGAGTGGTCAGCA   | 48 |
| 145 | TCGTACAATACCGGATCCCTAGTTCAGATCCGTAGAATATTGTGAT    | 48 |
| 146 | CTTAGCAATCTGCATAAATAGTAAAATGTCGGATGTCTGGGACGTACG  | 48 |
| 147 | TGCTAACAGTAACTCGGTCTGGGCTACAGGCTATTAAGGCAGATACTA  | 48 |
| 148 | GCGTACTGTAAACCCTTACGCATCACAATTTGCTAAGAGCTATGG     | 48 |
| 149 | TTTTTTTTGCCTAAGCGAGTAACATTTTTTTTTT                | 32 |
| 150 | TTTTTTTTTATAGTCTCGAAGTATTAATAATTT                 | 32 |
| 151 | TTTTTTTTTAGTATCTAAGCCTGATTTTTTTTT                 | 32 |
| 152 | TAGCAACTTGCTGACCTGTTAGCAGGACAATAAGATATCATTTTTTTTT | 48 |
| 153 | AATACTTCCCATAGCTTGTGGTTAGAAGATCCAAAATGCTTTTTTTTTT | 48 |
| 154 | TTTTTTTTTGTGCTAAAGTATCGCTTTTTTTTTT                | 32 |
| 155 | TTTTTTTTAAATTTTTGCGTTCAGTTTTTTTTT                 | 32 |
| 156 | TTTTTTTTGCTGTGAGTCACTCGACTAGATCCGCGTAAAGGGTTACA   | 48 |
| 157 | AGCATTGTGGATCTTCTGTACGATTAGCGAC                   | 32 |
| 158 | CTGAACGCCGTACGTCTCGAGTGACTCACAGC                  | 32 |
| 159 | TGATATCTTATTGTCCACGCGAAGCTTAGGC                   | 32 |
| 160 | TCAGGCTTTAATTTATAGTTGCTAGAGACTAT                  | 32 |

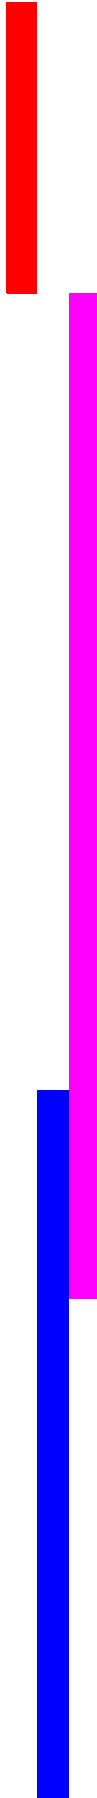



To construct polygonal cavity, sticky ends are added to the monomer. For triangular cavities, the location of Sticky End 1 on Monomer D is identical to that for hexagonal cavities, and Sticky End 1 is anchored to Monomer D by replacing some of the sequences in Monomer D as shown in Table 3. Similarly, for the construction of square cavities and pentagonal cavities, Sticky End 1 is anchored to Monomer B and Monomer C by sequence replacement, respectively (see Table 4 and Table 5). In addition, the locations of Sticky End 2 for triangular cavities are identical to that for square cavities (see Table 6). Similarly, the locations of Sticky End 2 for pentagonal cavities are identical to that for hexagonal cavities (see Table 7).

**Table 4.** Adding Sticky End 1 to Monomer D for the construction of triangular cavities (or hexagonal cavities). The sequences marked with “-”, which belong to Monomer D in Table 2, are replaced by the sequences marked with “+”.

| Name | Sequence (5'to3')                                 | Length |   |
|------|---------------------------------------------------|--------|---|
| 92   | CCACTATTTTCGGTCAGCGGGCCACGGGAACCTGACGGCTTTTTTTTT  | 48     | - |
| 113  | TTTTTTTTACTTCGTAGGCGTTTGTTTTTTTTT                 | 32     | - |
| 127  | TGATATCTTATTGTCCCACGCGAAGCTTAGGCCTTGAAATTTTTTTTT  | 48     | - |
| 140  | TTTTTTTTTTGGCGCCAGTACGCGTTTTTTTT                  | 32     | - |
| 142  | TTTTTTTTAATTTAGACGGTACATTTTTTTTT                  | 32     | - |
| 135  | AATCTAACAAATTTTTGCGTTCAGTGTTCATAGTGCACAATTTTTTTTT | 48     | - |
| 161  | TTTTTTTTACTTCGTAGGCGTTTGTTTTTTTTGCTGAAGAAG        | 42     | + |
| 162  | TGACGGCTTTTTTTTTATATGGAGAT                        | 26     | + |
| 163  | CCACTATTTTCGGTCAGCGGGCCACGGGAACC                  | 32     | + |
| 164  | CTTGAAATTTTTTTTGCTGAAGAAG                         | 26     | + |
| 165  | TGATATCTTATTGTCCCACGCGAAGCTTAGGC                  | 32     | + |
| 166  | TTTTTTTTTTGGCGCCAGTACGCGTTTTTTTTATATGGAGAT        | 42     | + |
| 167  | TTTTTTTTAATTTAGACGGTACATTTTTTTTGCTGAAGAAG         | 42     | + |
| 168  | GTGCACAATTTTTTATATGGAGAT                          | 26     | + |
| 169  | AATCTAACAAATTTTTGCGTTCAGTGTTCATA                  | 32     | + |

**Table 5.** Adding Sticky End 1 to Monomer B for the construction of square cavities. The sequences marked with “-”, which belong to Monomer B in Table 2, are replaced by the sequences marked with “+”.

| <b>Name</b> | <b>Sequence (5'to3')</b>                            | <b>Length</b> |   |
|-------------|-----------------------------------------------------|---------------|---|
| 87          | ACTAATCTCTGAGTTCTGGAATGGGATCTGGGAACTAGGGATCCGGTA    | 48            | - |
| 89          | TTACTATTCATCAGGTTGGTGCGCAGTGTACGGTGTTTGAGGATCTAG    | 48            | - |
| 108         | TAACCACAGTCTTTACACGCATGGCGTCGGGT                    | 32            | - |
| 109         | TTCGCGTGCCACACGTGCGCGGTGTGTATTGA                    | 32            | - |
| 111         | CCAGACATCCGACATTAAGTATAATAAATTA                     | 32            | - |
| 112         | GCCTTAATAGCCTGTAGGTTATTGGTTTGCGG                    | 32            | - |
| 115         | TTTTTTTTACCCGACGCCATGCGTCCTACAGCTCACGAGTGGTCAGCA    | 48            | - |
| 116         | TTTTTTTTACCGGATCCCTAGTCCCAGATCCGTAGAATATTGTGAT      | 48            | - |
| 91          | TTTTTTTTCAATACACACCGCGCGCTTTATATTGCAAGCTACGGGCG     | 48            | - |
| 114         | TTTTTTTTCCGCAAACATCGGAAGTTTTTTTT                    | 32            | - |
| 123         | TTTTTTTTAATTTATAGTTGCTATTTTTTTT                     | 32            | - |
| 124         | TTTTTTTTCTAGATCCGCGTAAAGTTTTTTTT                    | 32            | - |
| 170         | AACTAGGGATCCGGTATTTTTTTTGCTGAAGAAG                  | 34            | + |
| 171         | TAACCACAGTCTTTACACGCATGGCGTCGGGTTTTTTTTTGCTGAAGAAG  | 50            | + |
| 172         | TTCGCGTGCCACACGTGCGCGGTGTGTATTGATTTTTTTTGCTGAAGAAG  | 50            | + |
| 173         | GTGTTGAGGATCTAGTTTTTTTTTATATGGAGAT                  | 34            | + |
| 174         | CCAGACATCCGACATTAAGTATAATAAATTATTTTTTTATATGGAGAT    | 50            | + |
| 175         | GCCTTAATAGCCTGTAGGTTATTGGTTTGCGGTTTTTTTTTATATGGAGAT | 50            | + |
| 176         | ACTAATCTCTGAGTTCTGGAATGGGATCTGGG                    | 32            | + |
| 177         | TTACTATTCATCAGGTTGGTGCGCAGTGTACG                    | 32            | + |
| 178         | TCAATACACACCGCGCGCTTTATATTGCAAGCTACGGGCG            | 40            | + |
| 179         | ACCCGACGCCATGCGTCCTACAGCTCACGAGTGGTCAGCA            | 40            | + |
| 180         | TACCGGATCCCTAGTCCCAGATCCGTAGAATATTGTGAT             | 40            | + |
| 181         | CCGCAAACATCGGAAGTTTTTTTT                            | 24            | + |
| 182         | TAATTTATAGTTGCTATTTTTTTT                            | 24            | + |
| 183         | CTAGATCCGCGTAAAGTTTTTTTT                            | 24            | + |

**Table 6.** Adding Sticky End 1 to Monomer C for the construction of pentagonal cavities. The sequences marked with “-”, which belong to Monomer C in Table 2, are replaced by the sequences marked with “+”.

| <b>Name</b> | <b>Sequence (5'to3')</b>                           | <b>Length</b> |   |
|-------------|----------------------------------------------------|---------------|---|
| 92          | CCACTATTTTCGGTCAGCGGGCCACGGGAACCTGACGGCTTTTTTTTT   | 48            | - |
| 113         | TTTTTTTACTTCGTAGGCGTTTGTTTTTTTT                    | 32            | - |
| 147         | TGCTAACAGTAACTCGGTCTGGGCTACAGGCTATTAAGGCAGATACTA   | 48            | - |
| 153         | AATACTTCCCATAGCTTGTGGTTAGAAGATCCAAAATGCTTTTTTTTT   | 48            | - |
| 155         | TTTTTTTAAATTTTTGCGTTCAGTTTTTTTT                    | 32            | - |
| 159         | TGATATCTTATTGTCCACGCGAAGCTTAGGC                    | 32            | - |
| 184         | AATACTTCCCATAGCTTGTGGTTAGAAGATCC                   | 32            | + |
| 185         | AAAATGCTTTTTTTTTGCTGAAGAAG                         | 26            | + |
| 186         | TTTTTTTAAATTTTTGCGTTCAGTTTTTTTATATGGAGAT           | 42            | + |
| 187         | TGATATCTTATTGTCCACGCGAAGCTTAGGCTTTTTTTTTGCTGAAGAAG | 50            | + |
| 188         | TGCTAACAGTAACTCGGTCTGGGCTACAGGCT                   | 32            | + |
| 189         | ATTAAGGCAGATACTATTTTTTTTTATATGGAGAT                | 34            | + |

**Table 7.** Adding Sticky End 2 to Monomer D (or Monomer B) for the construction of triangular cavities (or square cavities). The sequences marked with “-”, which belong to Monomer D (or Monomer B) in Table 2, are replaced by the sequences marked with “+”.

| Name | Sequence (5'to3')                                 | Length | A0(B0) | A1(B1) | A2(B2) | A3(B3) | A4(B4) |
|------|---------------------------------------------------|--------|--------|--------|--------|--------|--------|
| 3    | CCGCTTCCTTTTTTTTTTTTTTTGGTGAGGAGGGATATGGAACTAG    | 48     | -      | -      |        |        |        |
| 21   | TTATTCTTCTTTCAACATATTTAAGTTTTTCAGGGTAGAGGAAGAGAGG | 48     | -      | -      | -      | -      |        |
| 65   | CGATATCCTTTCGCAGTGGAAGTAGGAAAACGGTAGACGTTAGGCGAA  | 48     |        |        | -      | -      | -      |
| 83   | CCTGAACCTTAAGTCCAAGTCGAAAAAATGAAAGTCAAGAGACACAA   | 48     |        |        |        |        | -      |
| 42   | TTTTTTTTGACTATGC                                  | 16     | -      |        |        |        |        |
| 16   | TACTACCTCCATCCTCTGTGCGCAATCGGTAATTTGAGCGCTCTGGCG  | 48     | -      | -      | -      |        |        |
| 34   | CGATTACTCCCATAACCTTAGTAACGATTTCCGACTGTCATGGATGCAT | 48     |        | -      | -      | -      | -      |
| 78   | TTAGAACTCCGATACCGACGCGATGAGCAATATAGTGTTTTGAGATAC  | 48     |        |        |        | -      | -      |
| 190  | CCGCTTCCTTTTTTTTTTTTTTTGGTGAGGACTTCTTCAGC         | 42     | +      |        |        |        |        |
| 191  | GGGATATGGAACTAGCTTCTTCAGC                         | 26     | +      | +      |        |        |        |
| 192  | TTATTCTTCTTTCAACATATTTAAGTTTTTCAGCTTCTTCAGC       | 42     | +      | +      | +      |        |        |
| 193  | GGTAGAGGAAGAGAGGGCTTCTTCAGC                       | 26     |        | +      | +      | +      |        |
| 194  | CGATATCCTTTCGCAGTGGAAGTAGGAAAACGCTTCTTCAGC        | 42     |        |        | +      | +      | +      |
| 195  | GTAGACGTTAGGCGAACTTCTTCAGC                        | 26     |        |        |        | +      | +      |
| 196  | CCTGAACCTTAAGTCCAAGTCGAAAAAATGACTTCTTCAGC         | 42     |        |        |        |        | +      |
| 197  | AAGTCAAGAGACACAACTTCTTCAGC                        | 26     |        |        |        |        |        |
| 198  | TTTTTTTTGACTATGCATCTCCATAT                        | 26     | +      |        |        |        |        |
| 199  | TACTACCTCCATCCTCTGTGCGCAATCGGTAATATCTCCATAT       | 42     | +      | +      |        |        |        |
| 200  | TTGAGCGCGTCTGGCGATCTCCATAT                        | 26     | +      | +      | +      |        |        |
| 201  | CGATTACTCCCATAACCTTAGTAACGATTTCCGATCTCCATAT       | 42     |        | +      | +      | +      |        |
| 202  | ACTGTCATGGATGCATATCTCCATAT                        | 26     |        |        | +      | +      | +      |
| 203  | TTAGAACTCCGATACCGACGCGATGAGCAATAATCTCCATAT        | 42     |        |        |        | +      | +      |
| 204  | TAGTGTTTTGAGATACATCTCCATAT                        | 26     |        |        |        |        | +      |
| 206  | CCGCTTCCTTTTTTTTTTTTTTTGGTGAGGA                   | 32     |        | +      |        |        |        |
| 207  | TTATTCTTCTTTCAACATATTTAAGTTTTTCAG                 | 32     |        |        |        | +      |        |
| 208  | GGTAGAGGAAGAGAGG                                  | 16     | +      |        |        |        |        |
| 210  | GTAGACGTTAGGCGAA                                  | 16     |        |        | +      |        |        |
| 211  | AAGTCAAGAGACACAA                                  | 16     |        |        |        |        | +      |
| 212  | TACTACCTCCATCCTCTGTGCGCAATCGGTAAT                 | 32     |        |        | +      |        |        |
| 213  | CGATTACTCCCATAACCTTAGTAACGATTTCCG                 | 32     |        |        |        |        | +      |
| 214  | ACTGTCATGGATGCAT                                  | 16     |        | +      |        |        |        |
| 215  | TAGTGTTTTGAGATAC                                  | 16     |        |        |        | +      |        |

**Table 8.** Adding Sticky End 2 to Monomer C (or Monomer D) for the construction of pentagonal cavities (or hexagonal cavities). The sequences marked with “-”, which belong to Monomer C (or Monomer D) in Table 2, are replaced by the sequences marked with “+”.

| Name | Sequence (5'to3')                                 | Length | C0(D0) | C1(D1) | C2(D2) | C3(D3) | C4(D4) |
|------|---------------------------------------------------|--------|--------|--------|--------|--------|--------|
| 7    | GCCACGACGCAAGCACGTATTATGGCGAAGATGACGGTACTATACAGG  | 48     | -      | -      |        |        |        |
| 25   | TCCCTGCGCTGTGCCCAAAGGCTGGATAGAGAATGGTTGAGTGAACGA  | 48     | -      | -      | -      | -      |        |
| 69   | CGCAGCCCTAAGTTCCGGGGGCGCTGGGGCCCGAGGTTTTAGAGGTCCG | 48     |        |        | -      | -      | -      |
| 87   | ACTAATCTCTGAGTCTGGAATGGGATCTGGGAACTAGGGATCCGGTA   | 48     |        |        |        |        | -      |
| 9    | TAACTATTACAATACCGCGCAAATGTTTGTGGCGGAATCAACAAGTCA  | 48     | -      | -      |        |        |        |
| 27   | TCGTGCCTTGGTCCCACGGCTAATGATGGCAGTTGCGGATACAAGAGC  | 48     | -      | -      | -      | -      |        |
| 71   | CCGAATCCGTATTCTCGGACGCGCTGGAGCCTGGTGTGCAGCAGGCCG  | 48     |        |        | -      | -      | -      |
| 89   | TTACTATTCATCAGGTTGGTGCAGGTGTACGGTGTGGAGGATCTAG    | 48     |        |        |        |        | -      |
| 218  | GCCACGACGCAAGCACGTATTATGGCGAAGATCTTCTTCAGC        | 42     | +      |        |        |        |        |
| 219  | GACGGTACTATACAGGCTTCTTCAGC                        | 26     | +      | +      |        |        |        |
| 220  | TCCCTGCGCTGTGCCCAAAGGCTGGATAGAGACTTCTTCAGC        | 42     | +      | +      | +      |        |        |
| 221  | ATGGTTGAGTGAACGACTTCTTCAGC                        | 26     |        | +      | +      | +      |        |
| 222  | CGCAGCCCTAAGTTCCGGGGGCGCTGGGGCCCGCTTCTTCAGC       | 42     |        |        | +      | +      | +      |
| 223  | AGGTTTTAGAGGTCCGCTTCTTCAGC                        | 26     |        |        |        | +      | +      |
| 224  | ACTAATCTCTGAGTCTGGAATGGGATCTGGGCTTCTTCAGC         | 42     |        |        |        |        | +      |
| 226  | TAACTATTACAATACCGCGCAAATGTTTGTGGATCTCCATAT        | 42     | +      |        |        |        |        |
| 227  | CGGAATCAACAAGTCAATCTCCATAT                        | 26     | +      | +      |        |        |        |
| 228  | TCGTGCCTTGGTCCCACGGCTAATGATGGCAGATCTCCATAT        | 42     | +      | +      | +      |        |        |
| 229  | TTGCGGATACAAGAGCATCTCCATAT                        | 26     |        | +      | +      | +      |        |
| 230  | CCGAATCCGTATTCTCGGACGCGCTGGAGCCTATCTCCATAT        | 42     |        |        | +      | +      | +      |
| 231  | GGTGTGCAGCAGGCCGATCTCCATAT                        | 26     |        |        |        | +      | +      |
| 232  | TTACTATTCATCAGGTTGGTGCAGGTGTACGATCTCCATAT         | 42     |        |        |        |        | +      |
| 234  | GCCACGACGCAAGCACGTATTATGGCGAAGAT                  | 32     |        | +      |        |        |        |
| 235  | TCCCTGCGCTGTGCCCAAAGGCTGGATAGAGA                  | 32     |        |        |        | +      |        |
| 236  | ATGGTTGAGTGAACGA                                  | 16     | +      |        |        |        |        |
| 237  | CGCAGCCCTAAGTTCCGGGGGCGCTGGGGCCCG                 | 32     |        |        | +      |        |        |
| 239  | AACTAGGGATCCGGTA                                  | 16     |        |        |        |        | +      |
| 240  | TAACTATTACAATACCGCGCAAATGTTTGTGG                  | 32     |        | +      |        |        |        |
| 241  | TCGTGCCTTGGTCCCACGGCTAATGATGGCAG                  | 32     |        |        |        | +      |        |
| 242  | TTGCGGATACAAGAGC                                  | 16     | +      |        |        |        |        |
| 244  | GGTGTGCAGCAGGCCG                                  | 16     |        |        | +      |        |        |
| 245  | GTGTTGAGGATCTAG                                   | 16     |        |        |        |        | +      |

## 11. References

- S1 N. C. Seeman, *J. Biomol. Struct. Dyn.*, 1990, **8**, 573-581.
- S2 B. Wei, M. Dai and P. Yin, *Nature*, 2012, **485**, 623-627.
- S3 Y. Ke, L. L. Ong, W. M. Shih and P. Yin, *Science*, 2012, **338**, 1177-1183.
- S4 P. W. K. Rothmund, *Nature*, 2006, **440**, 297-302.
